# Supplementary material for: Clinical significance of ERBB2 exon 16 skipping: analysis of a real-world retrospective observational cohort study
Source: PubMed Central journal article supplement — ESMO Open. 2020 Nov 19;5(6):e000985. doi: 10.1136/esmoopen-2020-000985 (PMC7678393; doi:10.1136/esmoopen-2020-000985), 2020-11-19
Supplement: esmoopen-2020-000985supp001.pdf [file esmoopen-2020-000985supp001.pdf]

Supplemental Table S1. Patients information with lung cancers

| Patient | Age | Sex | Cancer | Stage | Treatment History                                                                                                                                                                                                    | ERBB2 alterations<br>(sample type, time point, AF%)                                                                                                                                                                                          | ERBB2 Exonic<br>change                                                                                                        | Concurrent<br>Driver<br>Mutations |
|---------|-----|-----|--------|-------|----------------------------------------------------------------------------------------------------------------------------------------------------------------------------------------------------------------------|----------------------------------------------------------------------------------------------------------------------------------------------------------------------------------------------------------------------------------------------|-------------------------------------------------------------------------------------------------------------------------------|-----------------------------------|
| 1       | 54  | F   | NSCLC  | IV    | Chemotherapy;<br>Icotinib (11 months; PD);<br>Osimertinib (10 months; PD)                                                                                                                                            | c.1899-166_1946+44del<br>(FFPE, post-Osimertinib, 3.56%)                                                                                                                                                                                     | Full exon 16<br>deletion                                                                                                      | EGFR<br>exon19<br>deletion        |
| 3       | 55  | M   | Lung   | NA    | Surgery+Chemotherapy;<br>Whole-brain radiotherapy;<br>γ-knife treatment                                                                                                                                              | c.1898+2T>G (FFPE, primary, 3.98%)                                                                                                                                                                                                           | Intron 15 splice<br>site point<br>mutation                                                                                    | NA                                |
| 4       | 50  | M   | NSCLC  | IV    | Surgery+Chemotherapy+Radiotherapy;<br>Gefitinib (20 months; PD);<br>Afatinib (7 months; PD);<br>Osimertinib (1 months; PD)                                                                                           | c.1898+541_1946+1063del<br>(Tissue, post-Afatinib, 52.5%)                                                                                                                                                                                    | Full exon 16<br>deletion<br>(RNA seq<br>verified)                                                                             | EGFR<br>exon19<br>deletion        |
| 5       | 51  | M   | NSCLC  | IV    | Chemotherapy;<br>Afatinib (11 months; PD);<br>Chemotherapy+Trastuzumab (5 months; PD);<br>Afatinib+Trastuzumab (4 months; PD);<br>Osimertinib (5 months);<br>Osimertinib+Trastuzumab (4 months; PD);<br>Chemotherapy | c.1845_1947-1216delinsTTACAGGTGT<br>(Plasma, post-Afatinib, 3.07%)<br>c.1845_1947-1216delinsTTACAGGTGT<br>(Plasma, post-Afatinib, 14.67%)<br>c.1845_1947-1216delinsTTACAGGTGT /<br>c.1899-1G>T<br>(Plasma, post-Osimertinib, 30.34% / 4.76%) | Full exon 16<br>deletion<br>Full exon 16<br>deletion<br>Full exon 16<br>deletion / Intron<br>15 splice site<br>point mutation | EGFR<br>exon19<br>deletion        |
| 8       | 52  | F   | NSCLC  | IV    | Gefitinib (5 months; PD);<br>Osimertinib (4 months; PD);<br>Gefitinib+Osimertinib                                                                                                                                    | c.1899-658_1947-264delinsG /<br>c.1926_1946+15delCCCCGCCGAGCAGAGAG<br>CCAGGTTGGCCTGGACCCC<br>(Plasma, post-Osimertinib, 5.00% / 1.36%)                                                                                                       | Full exon 16<br>deletion                                                                                                      | EGFR<br>L858R                     |
| 10      | 67  | M   | NSCLC  | NA    | Chemotherapy (2 months; PD);<br>Radiotherapy (3 months; PD)                                                                                                                                                          | c.1899-2A>T (FFPE, post-radiotherapy, 16.45%)<br>c.1899-2A>T (Plasma, post-radiotherapy, 0.18%)                                                                                                                                              | Intron 15 splice<br>site point<br>mutation<br>Intron 15 splice<br>site point<br>mutation                                      | NA                                |
| 11      | 50  | F   | NSCLC  | IV    | Gefitinib (4 months; PD);<br>Afatinib (1 months; PD);<br>Anlotinib (3 months; PD)                                                                                                                                    | c.1899-1G>C (Plasma, post-Anlotinib, 53.05%)                                                                                                                                                                                                 | Intron 15 splice<br>site point<br>mutation                                                                                    | EGFR<br>L858R                     |

|    |    |   |       |    |                                                                                                                                                                                                                            |                                                                   |                                   |                            |
|----|----|---|-------|----|----------------------------------------------------------------------------------------------------------------------------------------------------------------------------------------------------------------------------|-------------------------------------------------------------------|-----------------------------------|----------------------------|
| 12 | 51 | F | NSCLC | NA | Chemotherapy;<br>Gefitinib;<br>Erlotinib;<br>Icotinib;<br>Afatinib;<br>Osimertinib;<br>anti-PD-1                                                                                                                           | c.1946_1946+1509del<br>(Plasma, post-TKIs, 13.51%)                | Intron 16 splice<br>site deletion | EGFR<br>L858R              |
| 14 | 70 | F | NSCLC | IV | Chemotherapy (15 months; PD);<br>Gefitinib (14 months; PD);<br>Osimertinib                                                                                                                                                 | c.1898+195_1947-677delinsTTAC<br>(FFPE, post-Gefitinib, 55.00%)   | Full exon 16<br>deletion          | EGFR<br>exon19<br>deletion |
| 15 | 43 | F | NSCLC | IV | Chemotherapy (1 cycle; PD);<br>Gefitinib+Osimertinib (2 months; PD);<br>Radiotherapy (4 months; SD);<br>Bevacizumab (2 months; PD);<br>Chemotherapy (2 months; PD);<br>Bevacizumab (1 month; PD);<br>Bevacizumab+Docetaxel | c.1899-144_1918del<br>(Plasma, post-Bevacizumab+Docetaxel, 1.38%) | Partial exon 16<br>deletion       | EGFR<br>exon19<br>deletion |
| 16 | 65 | F | NSCLC | NA | Icotinib (10 months; PD);<br>Chemotherapy+Osimertinib (3 months; PD);<br>Anlotinib (4 months; PD)                                                                                                                          | c.1898+86_1946+50del<br>(Plasma, post-Osimertinib, 1.51%)         | Full exon 16<br>deletion          | EGFR<br>exon19<br>deletion |
|    |    |   |       |    | c.1898+86_1946+50del<br>(Plasma, post-Anlotinib, 1.23%)                                                                                                                                                                    | Full exon 16<br>deletion                                          |                                   |                            |
| 17 | 28 | F | Lung  | NA | NA                                                                                                                                                                                                                         | c.1898+99_1946+718del<br>(FFPE, primary, 74.00%)                  | Full exon 16<br>deletion          | NA                         |
|    |    |   |       |    |                                                                                                                                                                                                                            | c.1898+99_1946+718del<br>(Plasma, primary, 86.00%)                | Full exon 16<br>deletion          |                            |

Notes: F, female; M, male; NA, not applicable; NSCLC, non-small cell lung cancer; PD, progressed disease; SD, stable disease; AF, allele frequency

**Supplemental Table S2. Patients information with non-lung cancers**

| Patient | Age | Sex | Cancer      | Stage | Treatment History                                                                                                                                                | ERBB2 alterations<br>(sample type, time point, AF%)                                   | ERBB2 Exonic<br>change                                                              |
|---------|-----|-----|-------------|-------|------------------------------------------------------------------------------------------------------------------------------------------------------------------|---------------------------------------------------------------------------------------|-------------------------------------------------------------------------------------|
| 2       | 62  | M   | Gallbladder | IV    | Surgery;<br>Chemotherapy                                                                                                                                         | c.1898+430_1946+142del (Plasma, primary, 8.48%)                                       | Full exon 16 deletion                                                               |
| 6       | 49  | F   | Rectal      | NA    | Surgery+Chemotherapy+Radiotherapy;<br>Irinotecan+Raltitrexed+Cetuximab (4 months; PD);<br>Surgery*;<br>Bevacizumab (5 cycles; PD);<br>Trastuzumab (2 cycles; PD) | c.1898+210_1947-449del (FFPE, primary, 10.71%)                                        | Full exon 16 deletion<br>(RNA seq verified)                                         |
|         |     |     |             |       |                                                                                                                                                                  | c.1898+210_1947-449del<br>(FFPE, post-surgery*, 28.30%)                               | Full exon 16 deletion                                                               |
|         |     |     |             |       |                                                                                                                                                                  | c.1898+210_1947-449del<br>(Plasma, post-trastuzumab, 51.98%)                          | Full exon 16 deletion                                                               |
| 7       | 62  | M   | Rectal      | NA    | Surgery+Chemotherapy;<br>Cetuximab (8 months; PD);<br>Surgery*;<br>Trastuzumab+Lapatinib (1 month; PR)                                                           | c.1898+162_1946+1681delinsT<br>(FFPE, primary, 66.97%)                                | Full exon 16 deletion                                                               |
|         |     |     |             |       |                                                                                                                                                                  | c.1898+162_1946+1681delinsT<br>(FFPE, post-surgery*, 52.00%)                          | Full exon 16 deletion                                                               |
| 9       | 49  | F   | Ovarian     | IV    | NA                                                                                                                                                               | c.1945_1946+35delAGGTTGGCCTGGACCCAG<br>GATGTACCCTTCATTGCC<br>(FFPE, primary, 37.14%)  | Intron 16 splice site<br>deletion (full exon 16<br>deletion verified by<br>RNA seq) |
|         |     |     |             |       |                                                                                                                                                                  | c.1945_1946+35delAGGTTGGCCTGGACCCAG<br>GATGTACCCTTCATTGCC<br>(Plasma, primary, 2.84%) | Intron 16 splice site<br>deletion                                                   |
| 13      | 80  | M   | Gastric     | NA    | NA                                                                                                                                                               | c.1899-106_1946+317del (Plasma, primary, 5.81%)                                       | Full exon 16 deletion                                                               |
|         |     |     |             |       |                                                                                                                                                                  | c.1899-106_1946+317del (Tissue, primary, 3.03%)                                       | Full exon 16 deletion                                                               |
| 18      | 62  | F   | Gastric     | NA    | NA                                                                                                                                                               | c.1898+79_1946+1247del (FFPE, primary, 47.00%)                                        | Full exon 16 deletion                                                               |

Notes: F, female; M, male; NA, not applicable; PD, progressed disease; PR, partial response; AF, allele frequency
